# Supplementary material
Source: PubMed Central journal article supplement (PMC2822494)
Supplement: 00444.2009_1.pdf [file 00444.2009_1.pdf]

Patient 1    Normal  
                  Control

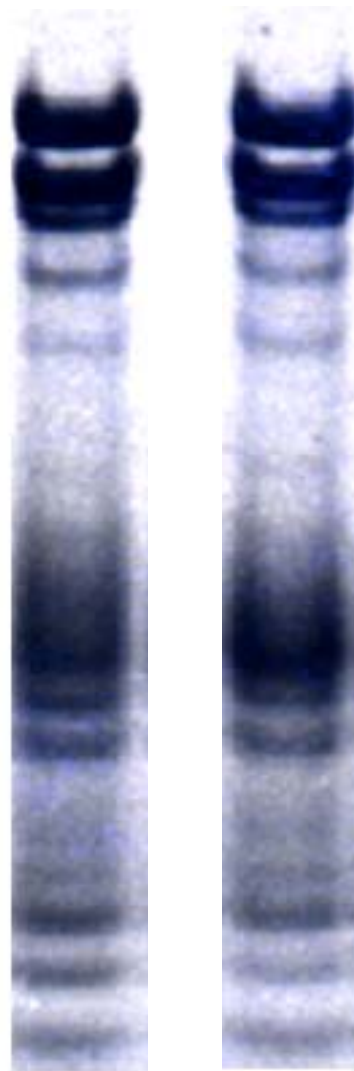

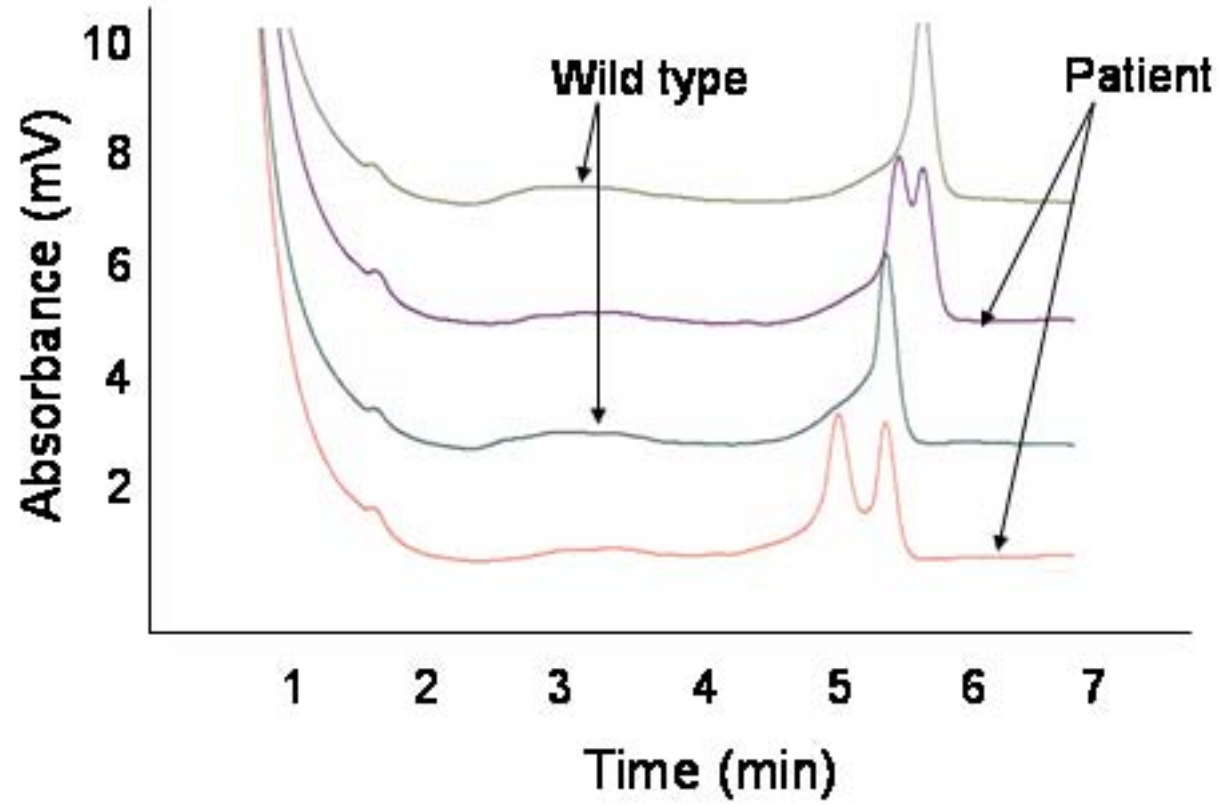

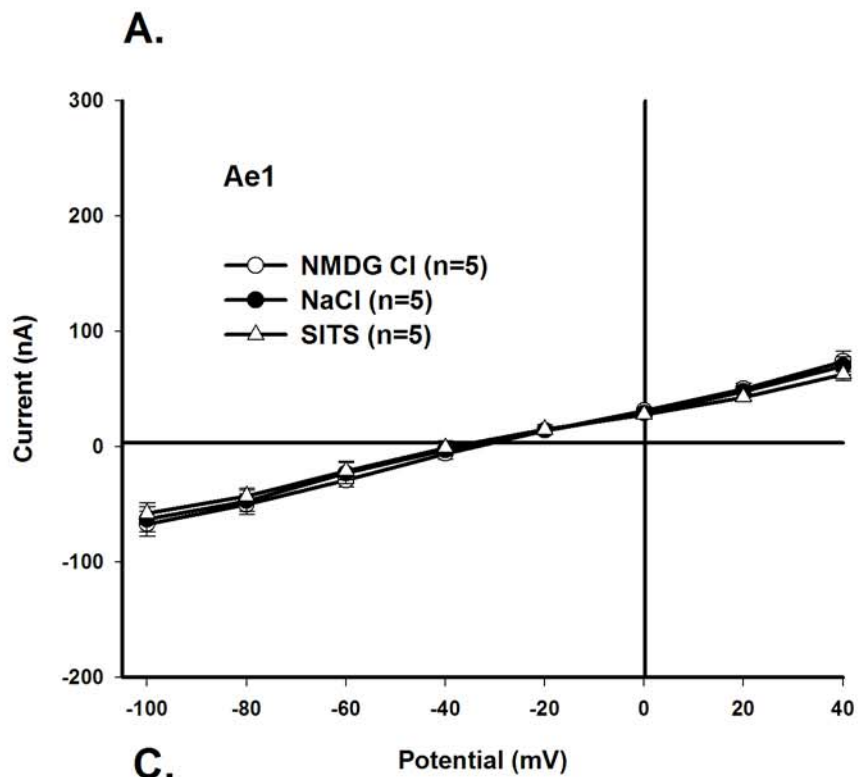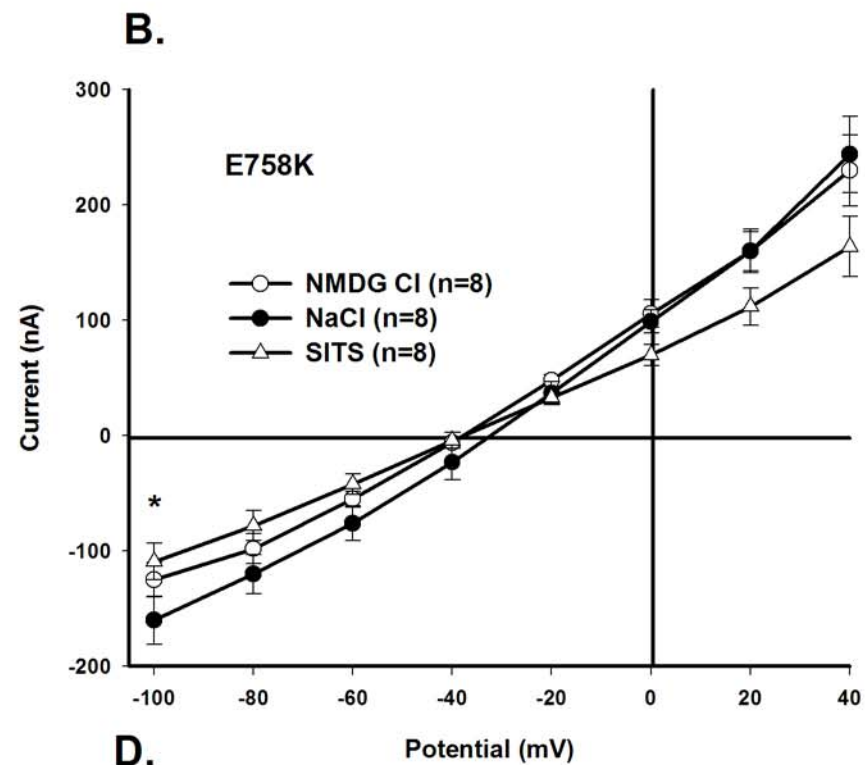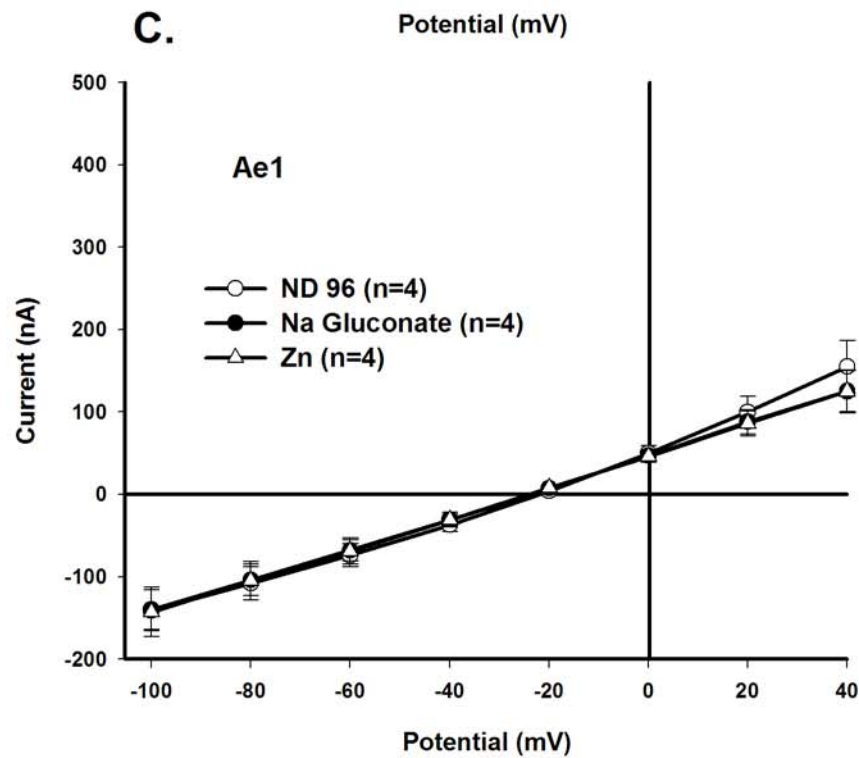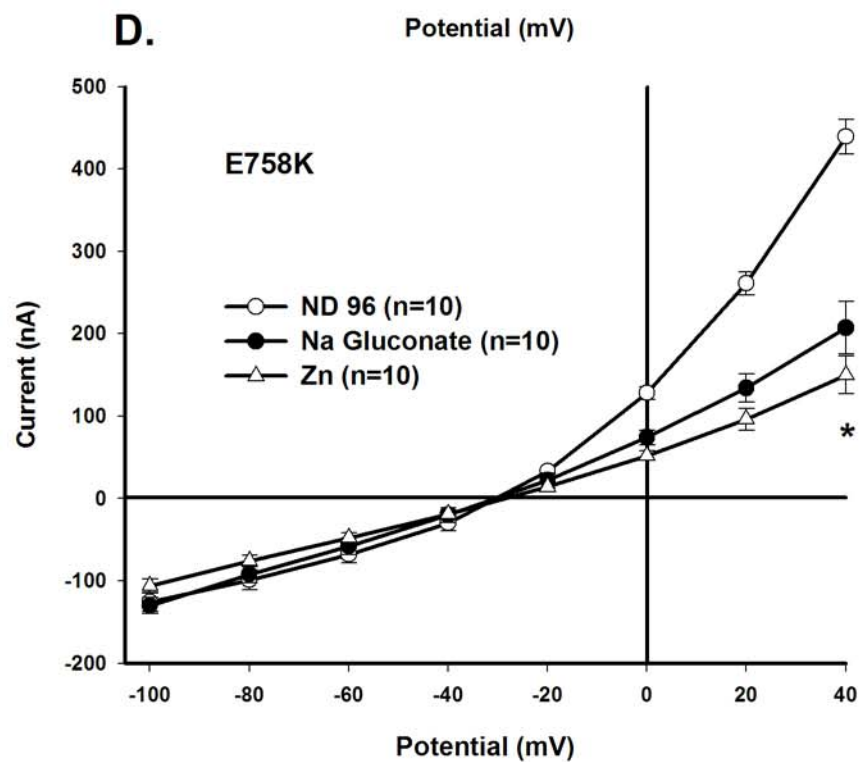

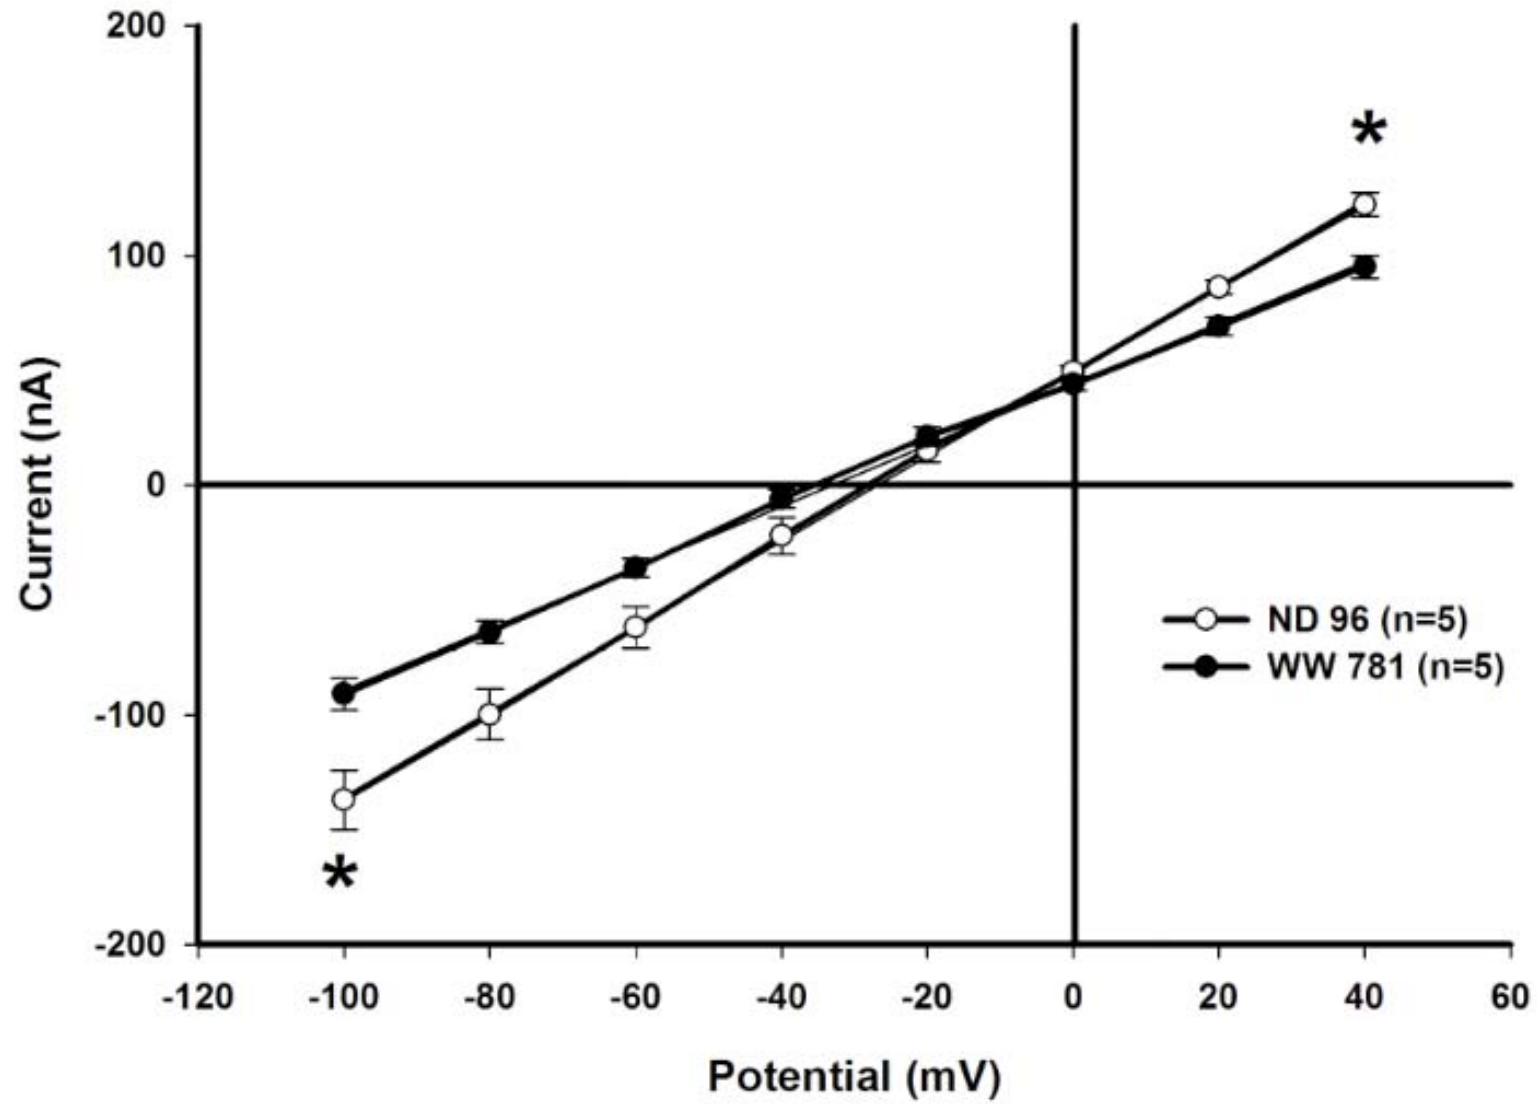

**A.**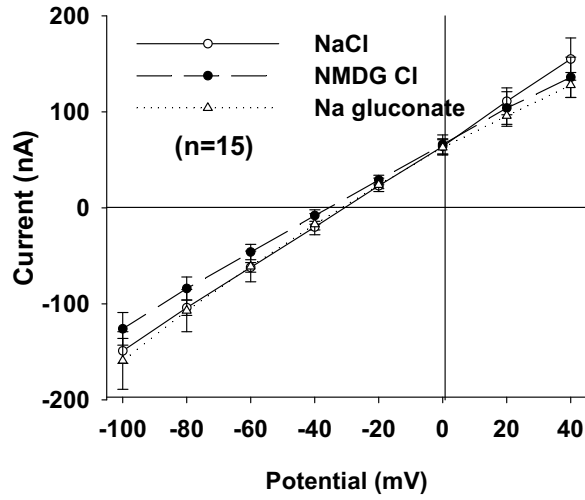**B.**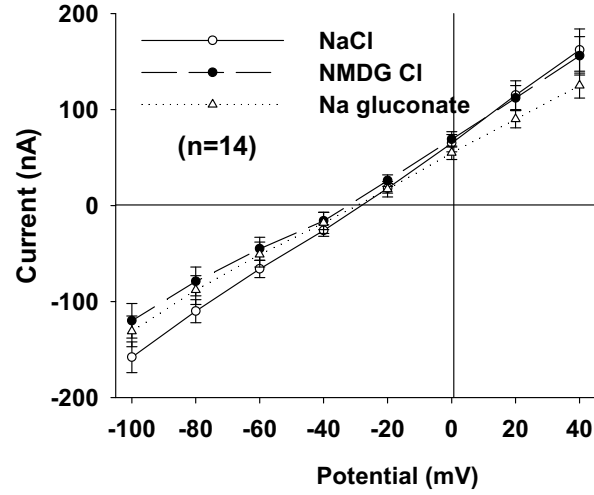**C.**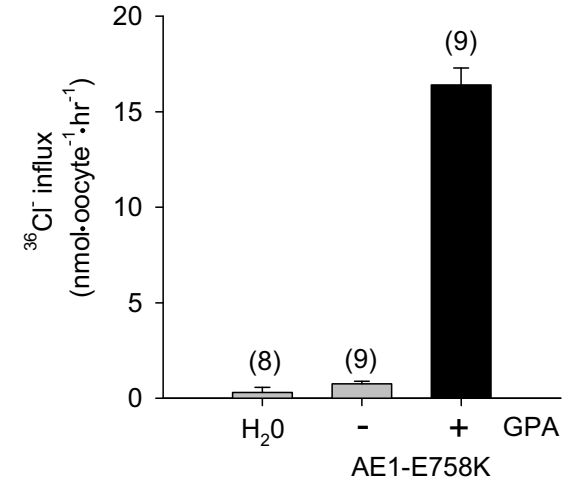**D.**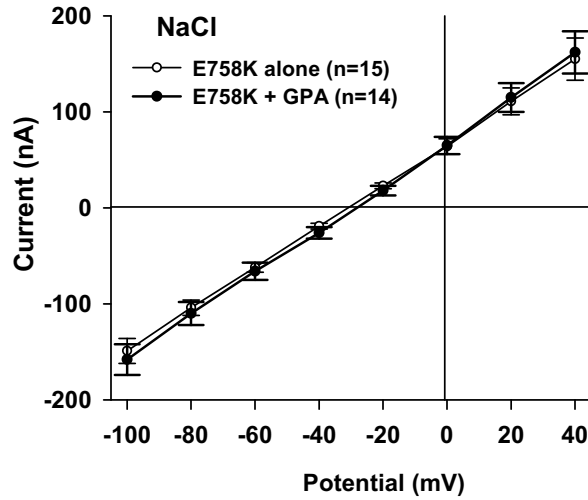**E.**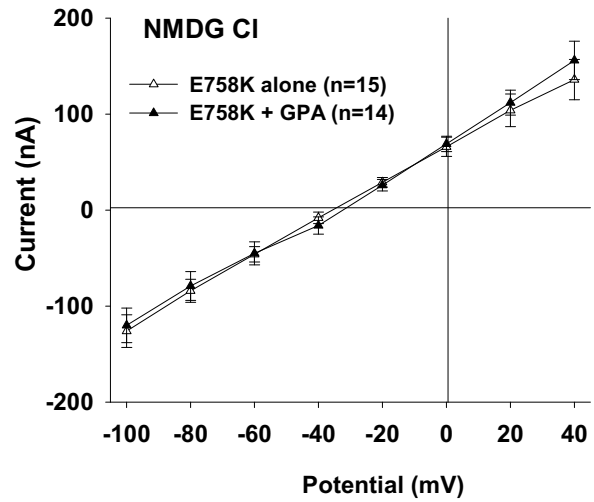**F.**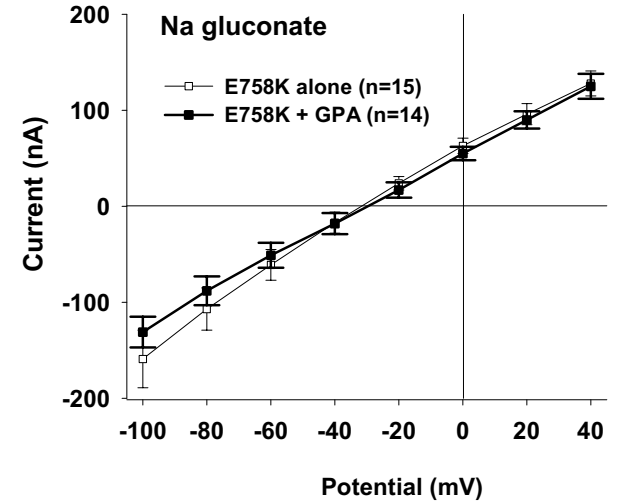

## Supplemental Figure Legends

**Supplemental Figure 1.** Coomassie Blue profile of erythrocyte membrane proteins from patient 1 and a normal control.

**Supplemental Figure 2.** DHPLC profile of amplified exon 17 from patient 2 and from a normal control.

**Supplemental Figure 3. Distinct patterns of partial inhibition by SITS and  $Zn^{2+}$  of currents in *Xenopus* oocytes expressing AE1 E758K.** **A.** Oocytes expressing wildtype AE1 display basal currents insensitive to SITS applied in NMDG chloride. **B.** Inward current in AE1 E758K-expressing oocytes is partially inhibited by SITS applied in NMDG chloride. \*,  $p < 0.001$  comparing absence and presence of inhibitor at -100 mV ( $p=0.07$  at +40 mV). **C.** Oocytes expressing wildtype AE1 display basal currents insensitive to SITS applied in Na gluconate. **D.** Oocytes expressing AE1 E758K exhibit outwardly rectifying current reduced after transition from chloride to gluconate, and inhibited by  $Zn^{2+}$ . All oocytes coexpressed GPA (2 ng cRNA) with wildtype or mutant AE1 (10 ng cRNA). Values are means  $\pm$  s.e.m. for (n) oocytes. \*,  $p < 0.001$  comparing absence and presence of inhibitor at +40 mV.

**Supplemental Figure 4. Inhibition by WW-781 of current in *Xenopus* oocytes expressing AE1 E758K.** Oocytes previously injected with AE1 E758K (10 ng cRNA) and GPA (2 ng cRNA) were subjected to two-electrode voltage clamp measurement of currents in ND=96 prior to (open circles) and following exposure to 100  $\mu$ M WW-781 (filled circles). Values are means  $\pm$  s.e.m. for (n) oocytes. \*,  $p < 0.01$  comparing absence and presence of inhibitor at -100 mV and +40 mV.

**Supplemental Figure 5. Coexpression of GPA does not increase currents in *Xenopus* oocytes expressing AE1 E758K.** **A.** I-V relationship of AE1 E758K-expressing oocytes (n=15) exposed sequentially to bath solutions of NaCl (open circles), NMDG Cl (filled circles), and Na gluconate (open triangles). **B.** I-V relationship of oocytes coexpressing AE1 E758K (10 ng) and GPA (2 ng; n=14) exposed sequentially to bath solutions of NaCl (open circles), NMDG Cl

(filled circles), and Na gluconate (open triangles). **C.** GPA-dependence of  $^{36}\text{Cl}^-$  influx in oocytes from one of the two frogs used in the experiments of panels A and B. **D.** Comparison of I-V relationships of oocytes in NaCl bath expressing AE1 E758K without coexpressed GPA (open circles, n=15; from panel A) with that from different oocytes (from the same two frogs) coexpressing AE1 E758K and GPA (filled circles, n=14; from panel B). **E.** Comparison of I-V relationships of oocytes in NMDG Cl bath expressing AE1 E758K without coexpressed GPA (open circles, n=15; from panel A) with that from different oocytes (from the same two frogs) coexpressing AE1 E758K and GPA (filled circles, n=14; from panel B). **F.** Comparison of I-V relationships of oocytes in Na gluconate bath expressing AE1 E758K without coexpressed GPA (open circles, n=15; from panel A) with that from different oocytes (from the same two frogs) coexpressing AE1 E758K and GPA (filled circles, n=14; from panel B). In panels D-F, the GPA-dependent current (the difference between the two plotted currents) is statistically indistinguishable from zero in all bath solutions tested.
